# Supplementary material for: Cohort Profile: Childhood morbidity and potential non-specific effects of the childhood vaccination programmes in the Nordic countries (NONSEnse): register-based cohort of children born 1990–2017/2018
Source: HighWire-hosted journal article supplement (doi:10.1136/bmjopen-2022-065984), 2023-02-01
Supplement: bmjopen-2022-065984supp001_data_supplement.pdf [file bmjopen-2022-065984supp001_data_supplement.pdf]

### Lexis diagram for Danish cohort including vaccination programme and data availability

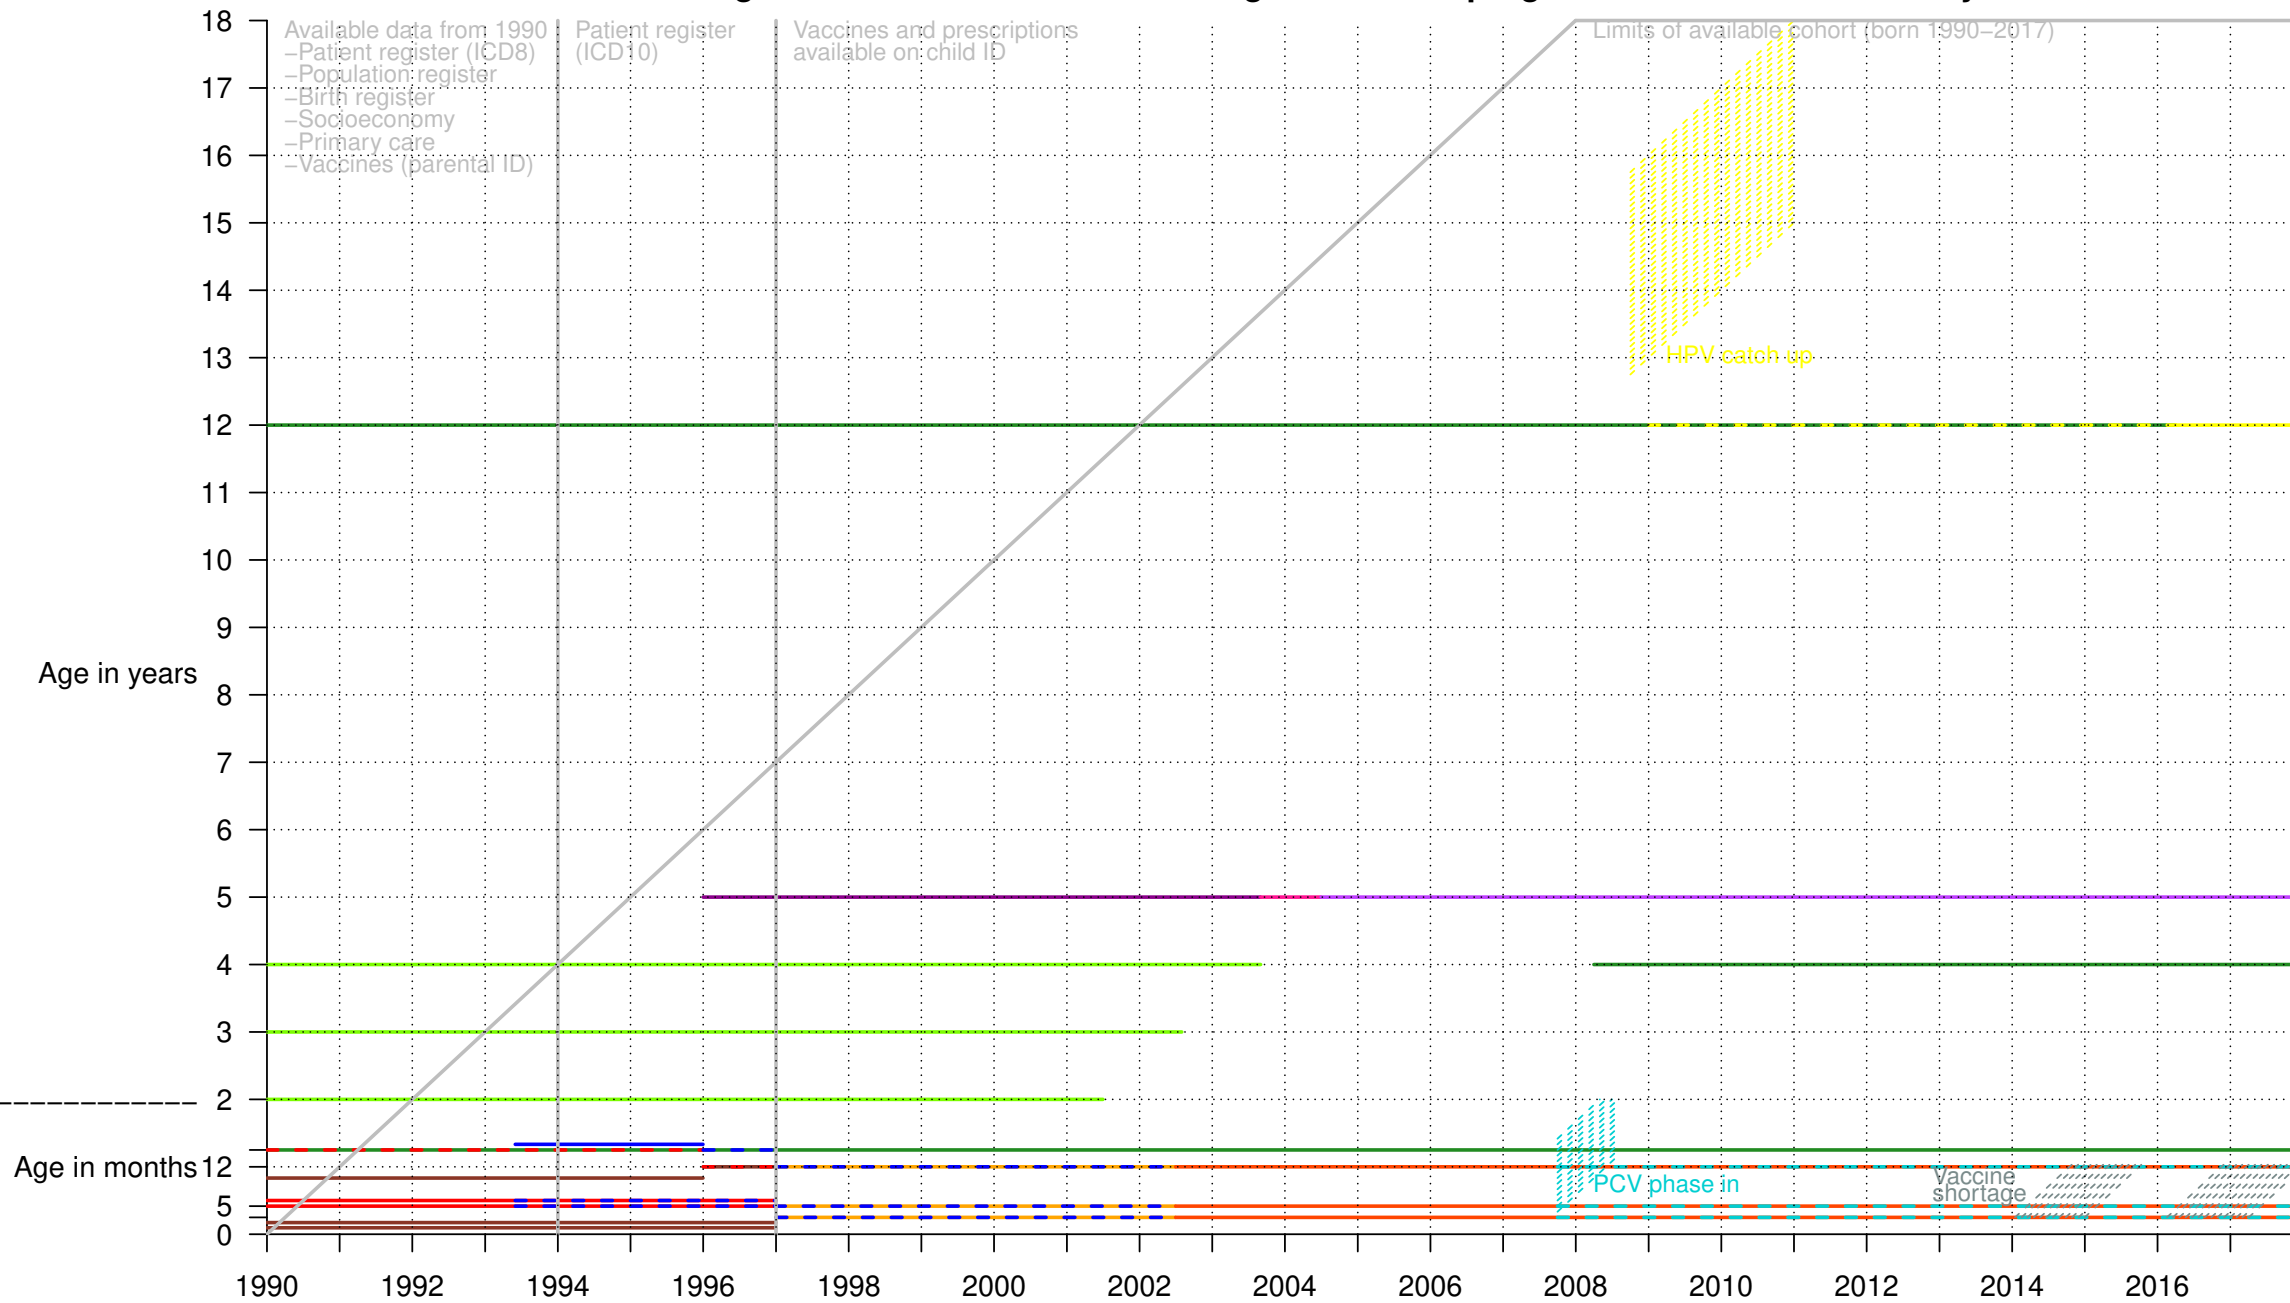

Gray text and gray lines indicate data availability

Color codes for vaccines:

wP; DT-IPV; DTaP-IPV; DTaP-IPV-Hib; Hib; PCV; MMR; OPV; DT; DTaP; DTaP-IPV; HPV

Abbreviations for vaccines:

Non-live vaccines: wP=whole cell pertussis; D=diphtheria; T=tetanus; IPV=inactivated polio vaccine; aP=pertussis vaccine(acellular);

Hib=Haemophilus influenzae type b; PCV=pneumococcal conjugate vaccine; HPV=Human papilloma virus

Live vaccines: MMR=measles-mumps-rubella; OPV=oral polio vaccine

## Lexis diagram for Finnish cohort including vaccination programme and data availability

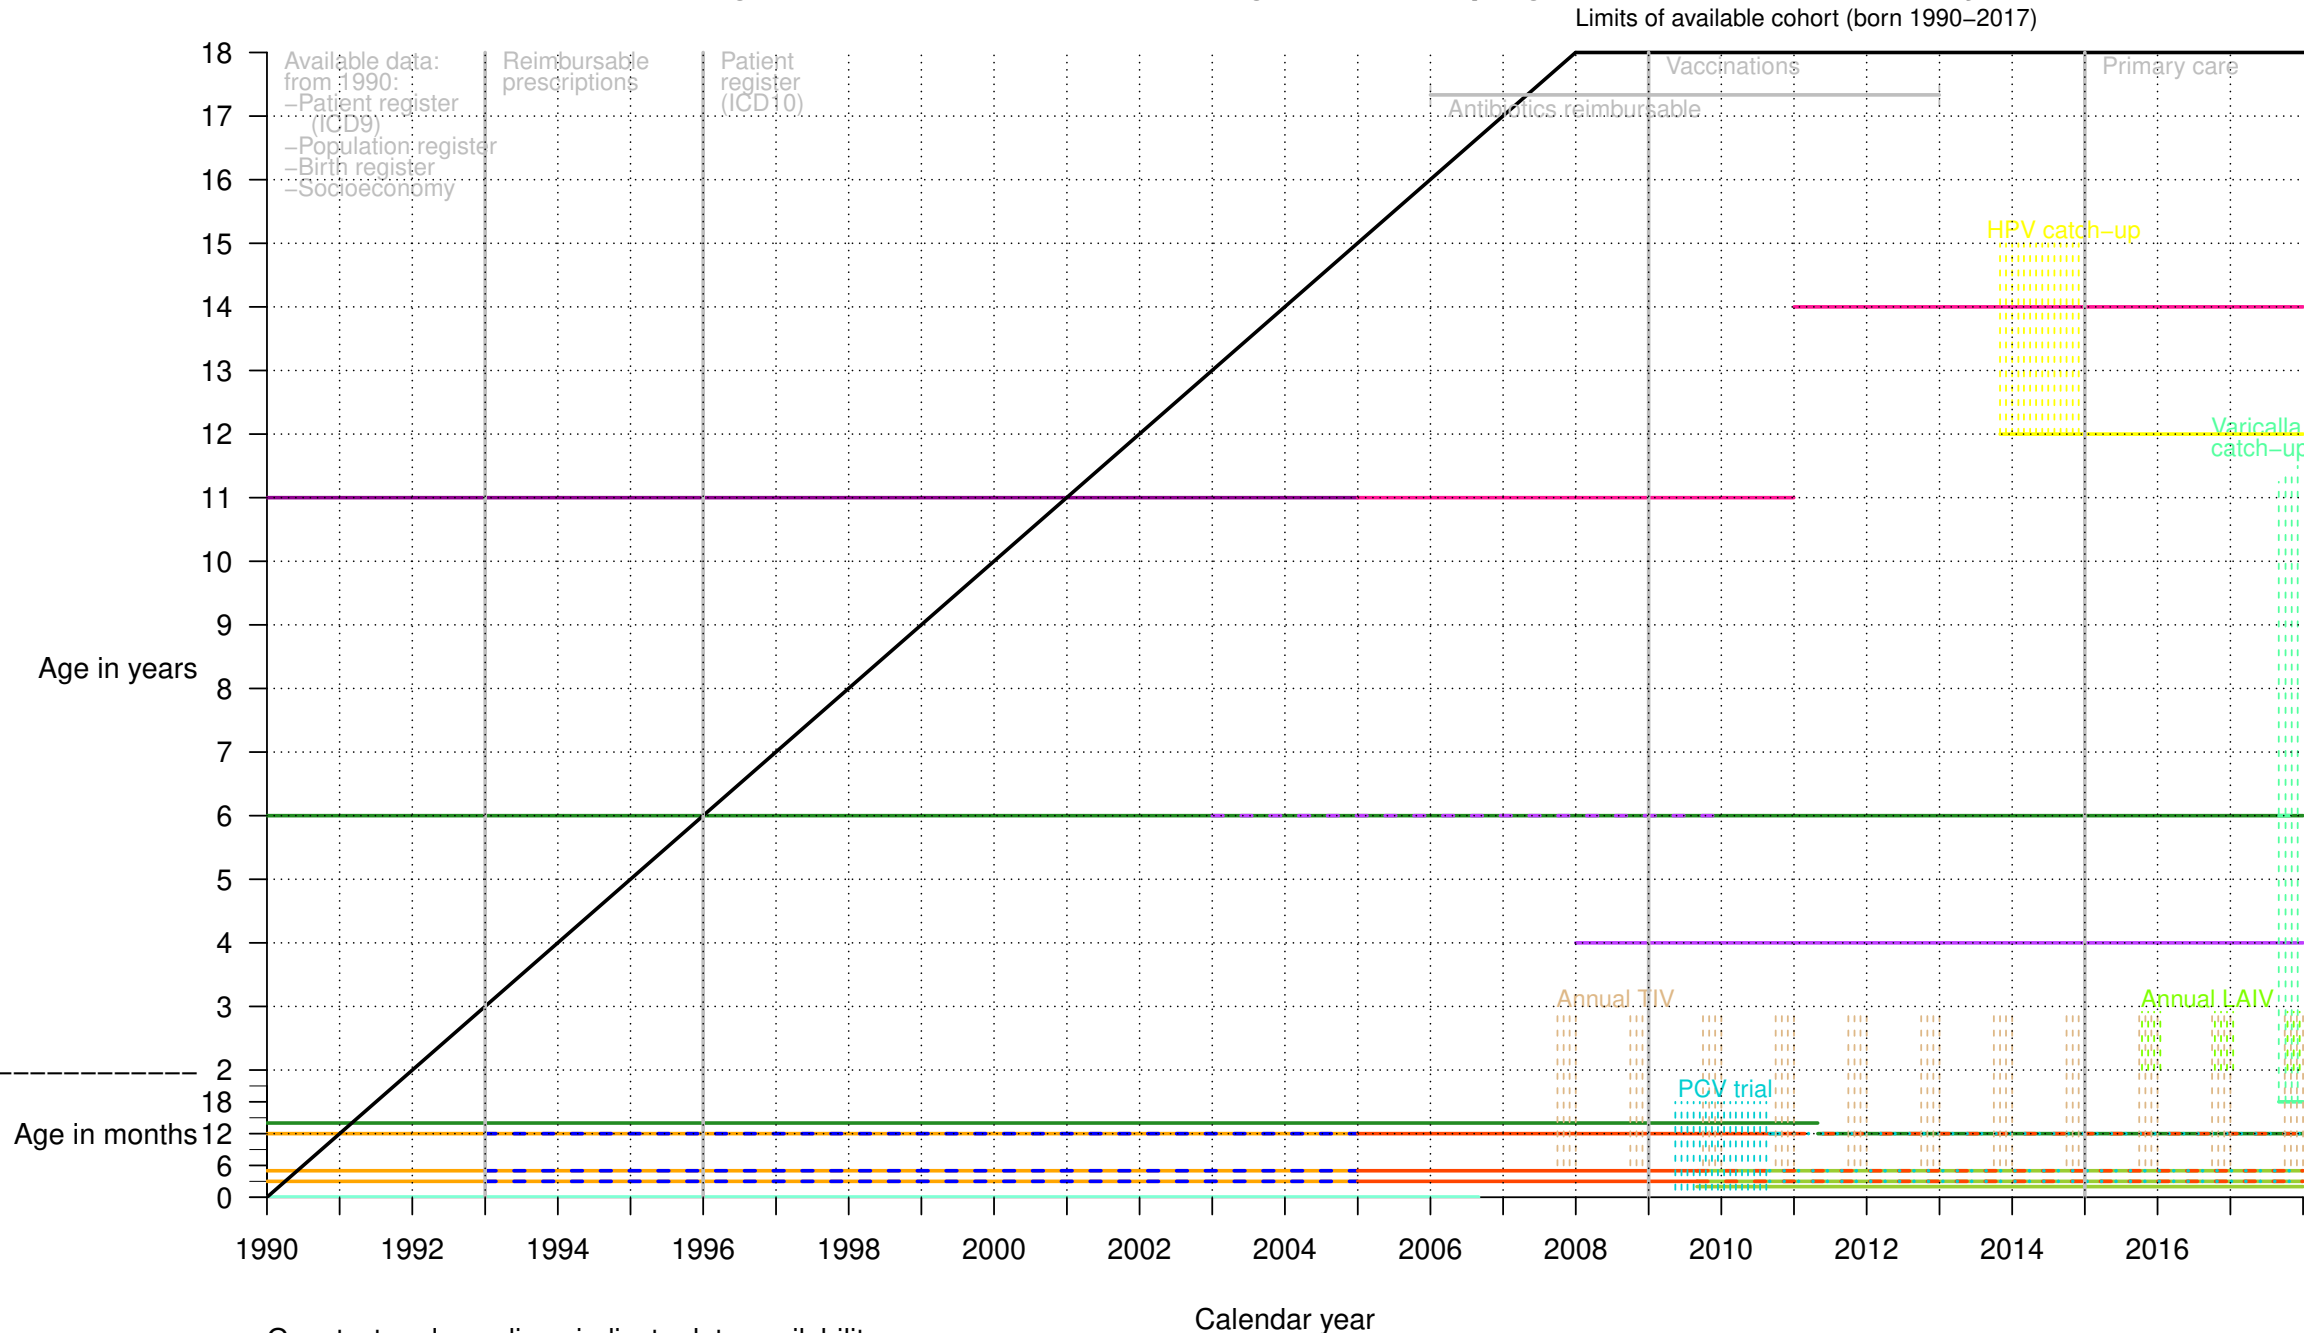

Gray text and gray lines indicate data availability

Color codes for vaccines:

BCG; RV; DTaP-IPV; Hib; DTaP-IPV-Hib; PCV; MMR; V; DTaP-IPV-booster; DT-booster; DTaP-booster; HPV

Abbreviations for vaccines:

Non-live vaccines: D=diphtheria; T=tetanus; aP=pertussis vaccine(acellular); IPV=inactivated polio vaccine; Hib=Haemophilus influenzae type b;

PCV=pneumococcal conjugate vaccine; TIV=trivalent influenza vaccine; HPV=Human papilloma virus

Live vaccines: BCG=Bacille Calmette-Guerin; RV=Rotavirus; MMR=measles-mumps-rubella; V=varicella; LAIV=live attenuated influenza vaccine

## Lexis diagram for Norwegian cohort including vaccination programme and data availability

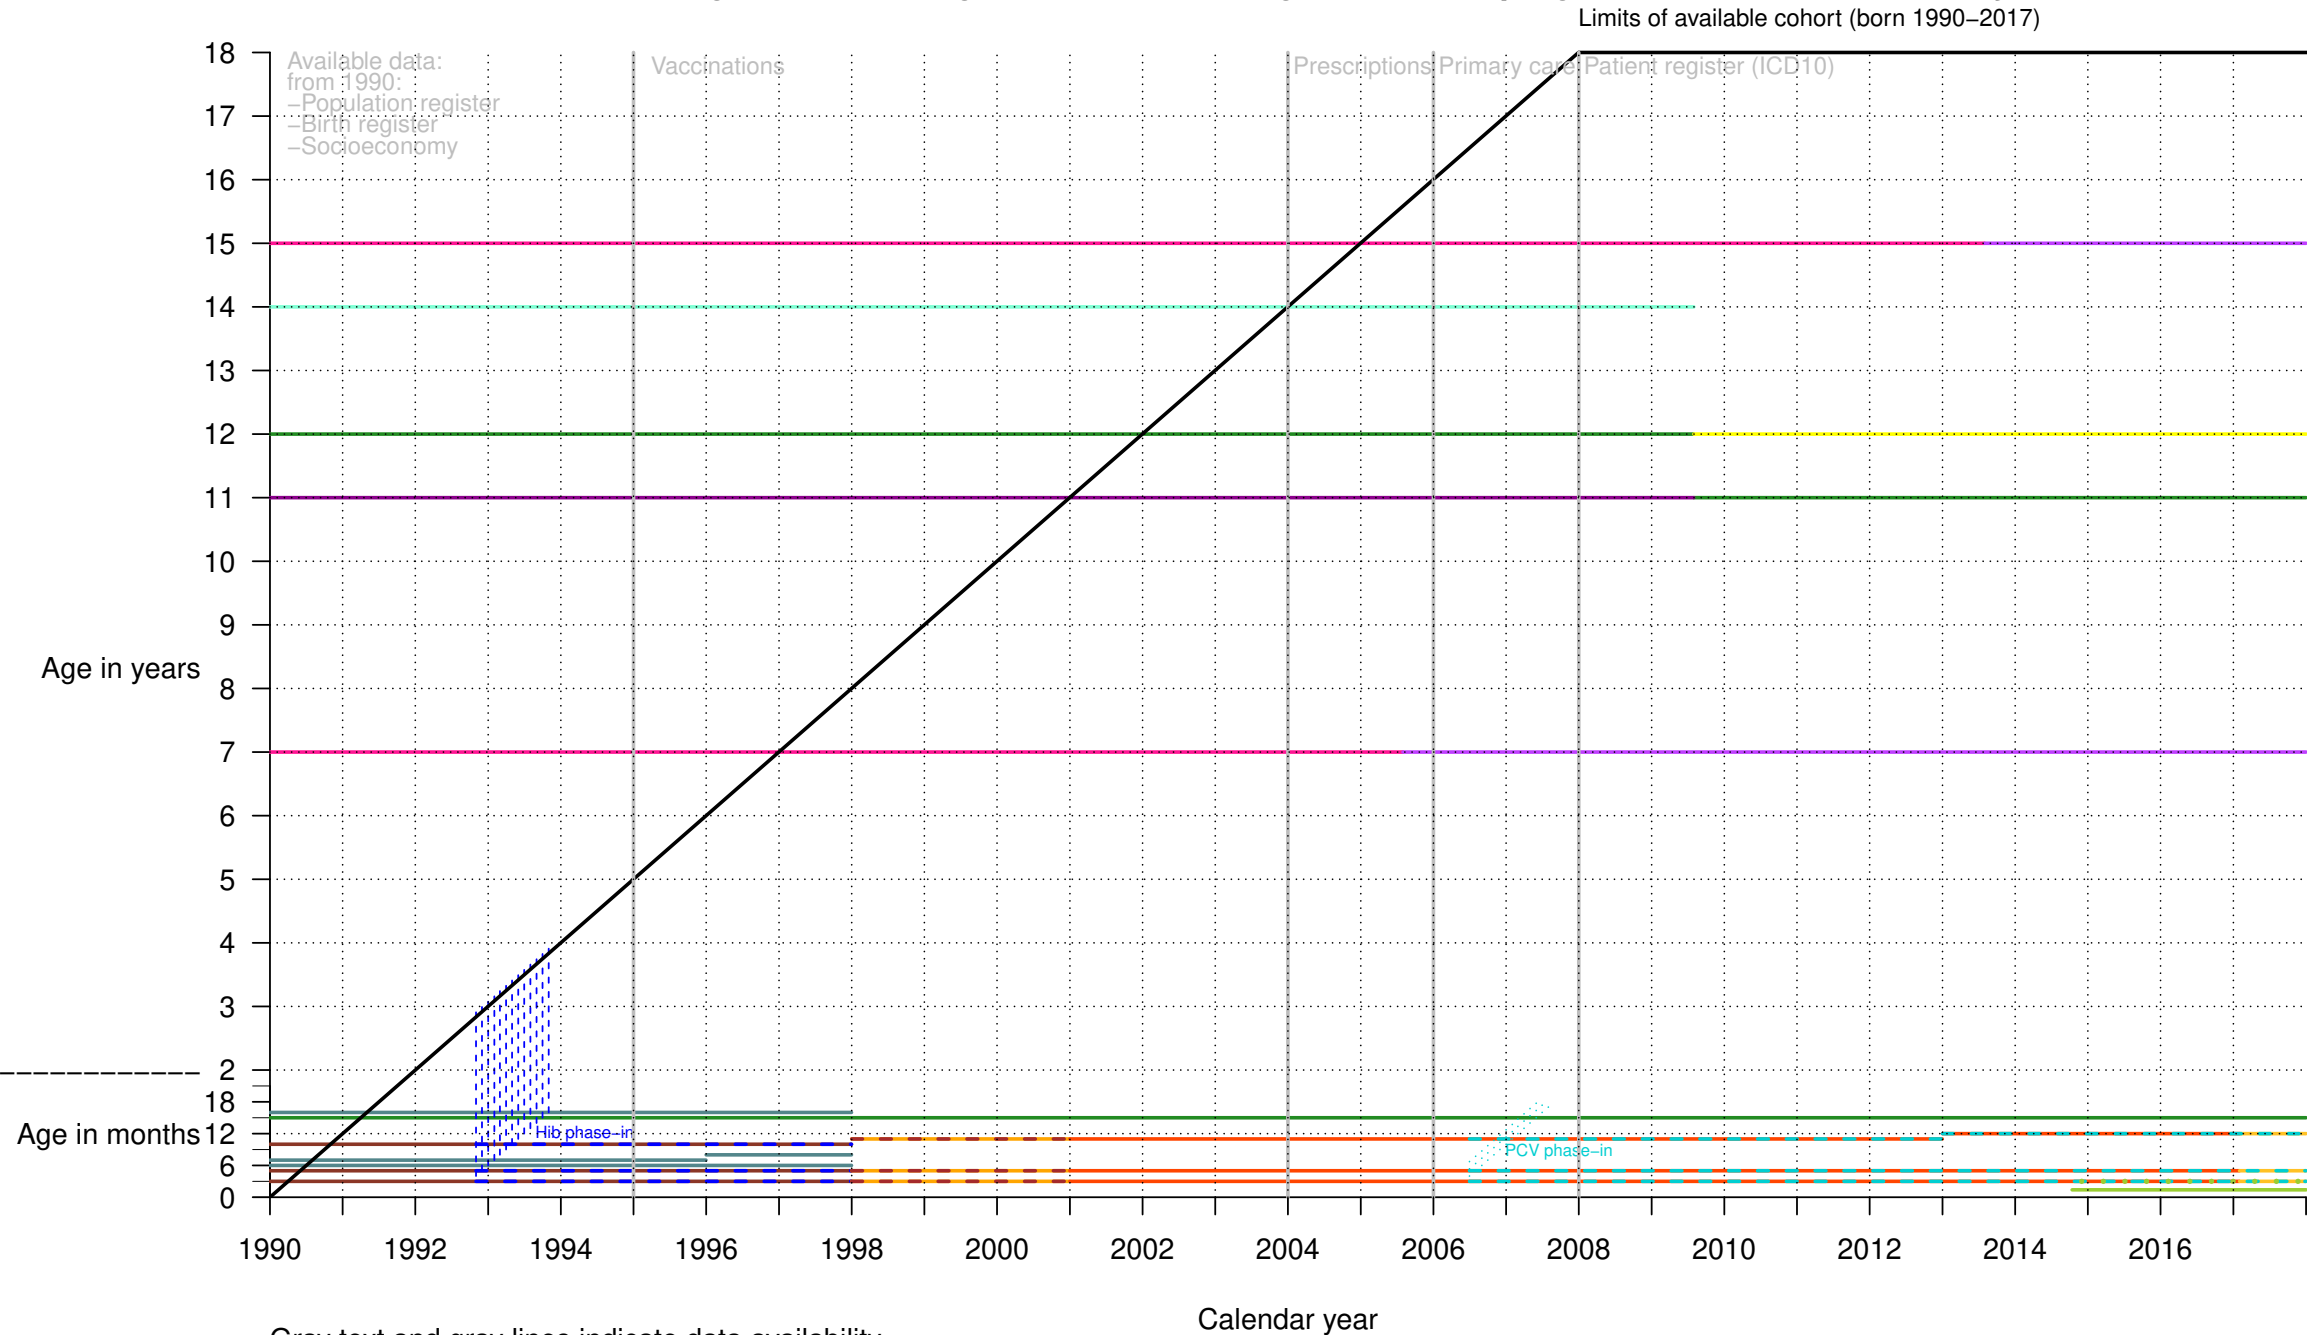

Gray text and gray lines indicate data availability

Color codes for vaccines:

RV; DTwP; Hib; DTaP; IPV-Hib; DTaP-IPV-Hib; PCV; DTaP-IPV-Hib-HepB; IPV; MMR; IPV-booster; DTaP-IPV-booster; DT-booster; HPV; BCG

Abbreviations for vaccines:

Non-live vaccines: D=diphtheria; T=tetanus; wP=whole-cell pertussis vaccine; Hib=Haemophilus influenzae type b; aP=pertussis vaccine(acellular);

IPV=inactivated polio vaccine; PCV=pneumococcal conjugate vaccine; HepB=Hepatitis B; HPV=Human papilloma virus

Live vaccines: RV=Rotavirus; MMR=measles-mumps-rubella; BCG=Bacille Calmette-Guerin

## Lexis diagram for Swedish cohort including vaccination programme and data availability

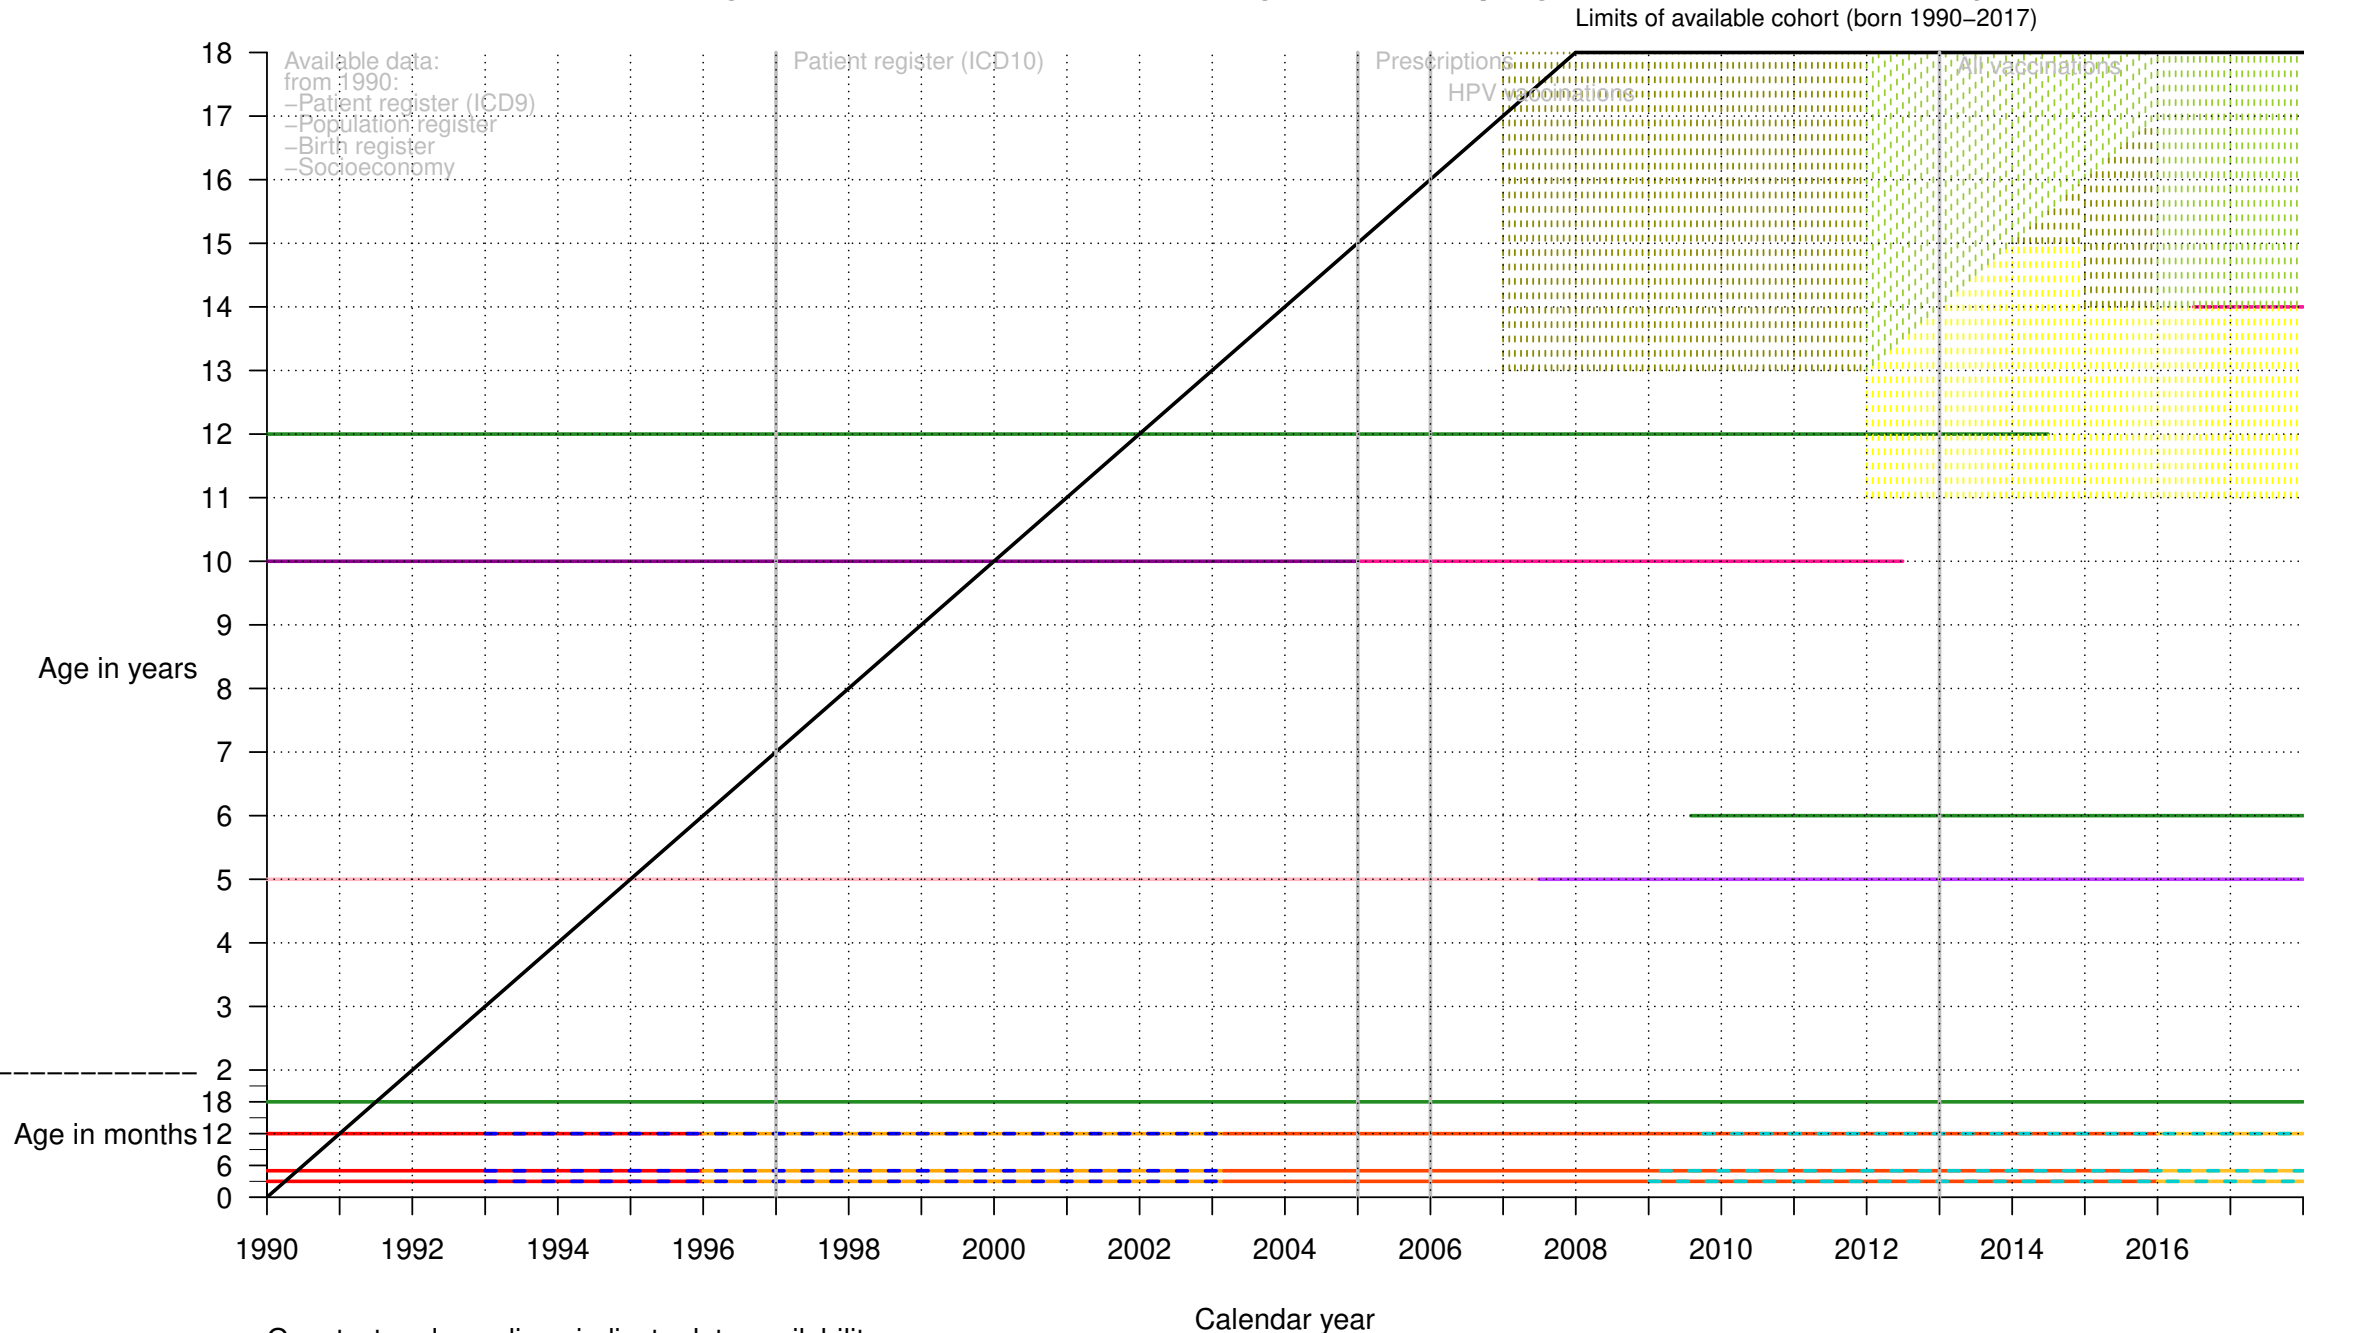

Gray text and gray lines indicate data availability

Color codes for vaccines:

DT-IPV; Hib; DTaP-IPV; DTaP-IPV-Hib; PCV; DTaP-IPV-Hib-HepB; MMR; IPV-booster; DTaP-IPV-booster; DT-booster; DTaP-booster; HPV-recommended age;

HPV-own payment with partly subsidy; HPV catch-up

Abbreviations for vaccines:

Non-live vaccines: D=diphtheria; T=tetanus; aP=pertussis vaccine(acellular); IPV=inactivated polio vaccine; Hib=Haemophilus influenzae type b;

PCV=pneumococcal conjugate vaccine; HepB=Hepatitis B; HPV=Human papilloma virus

Live vaccines: MMR=measles-mumps-rubella
