# Supplementary material for: Cohort Profile: Childhood morbidity and potential non-specific effects of the childhood vaccination programmes in the Nordic countries (NONSEnse): register-based cohort of children born 1990–2017/2018
Source: HighWire-hosted journal article supplement (doi:10.1136/bmjopen-2022-065984), 2023-02-01
Supplement: bmjopen-2022-065984supp003_data_supplement.pdf [file bmjopen-2022-065984supp003_data_supplement.pdf]

## Online supplementary files

**sTable 1: Vaccination coverage<sup>1</sup> at 2 years of age according to year of birth among children born in the respective countries**

**sTable2: Human papilloma virus vaccination coverage<sup>1</sup> before 14 years of age of vaccination among girls<sup>2</sup> born in the respective countries**

**sTable 3: Socio-economic factors at 10 years of age**

**sTable 4: ATC codes obtained for the study population in each country within NONSEnse**

**sTable 1: Vaccination coverage<sup>1</sup> at 2 years of age according to year of birth among children born in the respective countries**

| <b>Denmark</b> |                                |                 |                 |                 |                 |                               |
|----------------|--------------------------------|-----------------|-----------------|-----------------|-----------------|-------------------------------|
| Year of birth  | Eligible <sup>2</sup> Children | DTP1 % (95% CI) | DTP2 % (95% CI) | DTP3 % (95% CI) | MMR1 % (95% CI) |                               |
| 1997           | 66,406                         | 98.9            | 96.0            | 82.2            | 81.5            |                               |
| 1998           | 64,936                         | 99.0            | 97.0            | 85.0            | 83.6            |                               |
| 1999           | 64,996                         | 99.0            | 97.0            | 84.9            | 84.5            |                               |
| 2000           | 65,811                         | 99.0            | 97.3            | 86.2            | 85.9            |                               |
| 2001           | 64,207                         | 99.1            | 97.4            | 86.4            | 85.5            |                               |
| 2002           | 62,948                         | 99.1            | 97.0            | 84.1            | 84.9            |                               |
| 2003           | 63,462                         | 98.9            | 96.6            | 82.5            | 85.2            |                               |
| 2004           | 63,339                         | 98.9            | 96.5            | 82.7            | 86.8            |                               |
| 2005           | 62,912                         | 98.9            | 96.0            | 80.1            | 84.8            |                               |
| 2006           | 63,769                         | 99.0            | 95.8            | 78.7            | 84.4            |                               |
| 2007           | 63,006                         | 99.0            | 96.4            | 80.9            | 82.6            |                               |
| 2008           | 63,892                         | 99.2            | 97.2            | 83.9            | 83.7            |                               |
| 2009           | 61,676                         | 99.3            | 97.6            | 86.6            | 86.2            |                               |
| 2010           | 62,200                         | 99.2            | 97.9            | 88.8            | 87.3            |                               |
| 2011           | 57,892                         | 99.2            | 98.0            | 89.7            | 86.7            |                               |
| 2012           | 56,842                         | 99.2            | 98.0            | 90.0            | 86.4            |                               |
| 2013           | 54,881                         | 98.9            | 97.6            | 88.5            | 88.3            |                               |
| 2014           | 55,753                         | 98.8            | 97.5            | 87.6            | 88.4            |                               |
| 2015           | 57,100                         | 98.9            | 98.0            | 93.2            | 90.3            |                               |
| 2016           | 23,103                         | 99.0            | 98.3            | 94.7            | 90.7            |                               |
| <b>Finland</b> |                                |                 |                 |                 |                 |                               |
| Year of birth  | Eligible <sup>2</sup> Children | DTP1 % (95% CI) | DTP2 % (95% CI) | DTP3 % (95% CI) | MMR1 % (95% CI) | Rota virus vaccine % (95% CI) |
| 2009           | 59,934                         | 94.0            | 92.7            | 89.4            | 87.8            | 63.8                          |
| 2010           | 60,560                         | 96.7            | 94.2            | 90.8            | 91.6            | 90.7                          |
| 2011           | 59,645                         | 97.0            | 95.1            | 90.4            | 92.3            | 90.8                          |
| 2012           | 59,309                         | 95.7            | 94.5            | 90.3            | 91.9            | 91.2                          |
| 2013           | 58,249                         | 97.5            | 95.7            | 91.8            | 93.3            | 90.4                          |

|               |                                |                 |                 |                 |                 |                               |
|---------------|--------------------------------|-----------------|-----------------|-----------------|-----------------|-------------------------------|
| 2014          | 57,693                         | 97.6            | 96.5            | 89.3            | 92.6            | 91.6                          |
| 2015          | 55,569                         | 98.0            | 96.6            | 88.1            | 93.4            | 92.1                          |
| <b>Norway</b> |                                |                 |                 |                 |                 |                               |
| Year of birth | Eligible <sup>2</sup> Children | DTP1 % (95% CI) | DTP2 % (95% CI) | DTP3 % (95% CI) | MMR1 % (95% CI) | Rota virus vaccine % (95% CI) |
| 1995          | 59964                          | 98.5            | 97.9            | 95.8            | 94.7            |                               |
| 1996          | 60652                          | 98.2            | 97.4            | 95.4            | 94.3            |                               |
| 1997          | 59431                          | 98.5            | 98.0            | 96.2            | 94.4            |                               |
| 1998          | 57999                          | 98.7            | 98.2            | 96.4            | 94.1            |                               |
| 1999          | 58975                          | 98.8            | 98.3            | 96.4            | 94.1            |                               |
| 2000          | 58907                          | 98.6            | 98.0            | 96.1            | 89.2            |                               |
| 2001          | 56405                          | 98.7            | 98.3            | 96.1            | 89.3            |                               |
| 2002          | 55232                          | 98.8            | 98.5            | 96.7            | 92.7            |                               |
| 2003          | 56301                          | 99.0            | 98.6            | 96.8            | 94.2            |                               |
| 2004          | 56734                          | 99.1            | 98.8            | 97.5            | 94.7            |                               |
| 2005          | 56531                          | 99.2            | 99.0            | 97.6            | 94.4            |                               |
| 2006          | 58316                          | 99.1            | 98.8            | 97.3            | 94.2            |                               |
| 2007          | 58199                          | 99.0            | 98.6            | 96.7            | 94.0            |                               |
| 2008          | 60284                          | 99.0            | 98.5            | 96.6            | 93.8            |                               |
| 2009          | 61465                          | 98.9            | 98.6            | 97.4            | 94.4            |                               |
| 2010          | 61080                          | 98.9            | 98.5            | 97.3            | 95.0            |                               |
| 2011          | 59855                          | 98.8            | 98.4            | 97.2            | 94.8            |                               |
| 2012          | 59937                          | 98.6            | 98.2            | 96.6            | 95.0            |                               |
| 2013          | 58745                          | 98.6            | 98.0            | 96.5            | 95.5            |                               |
| 2014          | 58839                          | 98.7            | 98.3            | 96.6            | 95.9            |                               |
| 2015          | 58954                          | 98.6            | 98.1            | 96.6            | 95.7            | 94.1                          |
| 2016          | 58975                          | 98.5            | 97.8            | 96.3            | 95.9            | 94.8                          |
| <b>Sweden</b> |                                |                 |                 |                 |                 |                               |
| Year of birth | Eligible <sup>2</sup> Children | DTP1 N (%)      | DTP2 N (%)      | DTP3 N (%)      | MMR1 (%)        |                               |
| 2013          | 113,457                        | 97.6            | 95.1            | 83.3            | 89.1            |                               |
| 2014          | 114,639                        | 98.0            | 95.9            | 86.1            | 90.7            |                               |
| 2015          | 114,542                        | 98.1            | 96.3            | 87.8            | 91.8            |                               |

Abbreviations: DTP1: First dose of Diphtheria, Tetanus, and acellular Pertussis containing vaccine; DTP2: Second dose of Diphtheria, Tetanus, and acellular Pertussis containing vaccine; DTP3: Third dose of Diphtheria, Tetanus, and acellular Pertussis containing vaccine; MMR: Measles-Mumps-Rubella vaccine; Rota: Rota virus vaccine.

<sup>1</sup>The coverage reflects the number of registered vaccines and may thus underestimate the actual vaccination coverage in the countries. <sup>2</sup>Including children born in the country from birth cohorts where vaccines administered between 0-2 years of age are registered in the vaccination registers (data availability period).

**sTable 2: Human papilloma virus vaccination coverage<sup>1</sup> before 14 years of age of vaccination among girls<sup>2</sup> born in the respective countries**

|               | Denmark                        |                       |                       | Finland                        |                       |                       | Norway                         |                       |                       | Sweden                         |                       |                       |
|---------------|--------------------------------|-----------------------|-----------------------|--------------------------------|-----------------------|-----------------------|--------------------------------|-----------------------|-----------------------|--------------------------------|-----------------------|-----------------------|
| Year of birth | Eligible <sup>3</sup> children | HPV1 vaccinated N (%) | HPV2 vaccinated N (%) | Eligible <sup>3</sup> children | HPV1 vaccinated N (%) | HPV2 vaccinated N (%) | Eligible <sup>3</sup> children | HPV1 vaccinated N (%) | HPV2 vaccinated N (%) | Eligible <sup>3</sup> children | HPV1 vaccinated N (%) | HPV2 vaccinated N (%) |
| 1998          | 34,392                         | 85.7                  | 81.2                  |                                |                       |                       | 30,914                         | 76.5 (76.0, 77.0)     | 75.8                  |                                |                       |                       |
| 1999          | 34,484                         | 86.8                  | 82.4                  |                                |                       |                       | 31,391                         | 78.5                  | 77.7                  |                                |                       |                       |
| 2000          | 34,881                         | 86.5                  | 82.3                  |                                |                       |                       | 31,490                         | 80.2                  | 79.5 (79.0, 79.9)     |                                |                       |                       |
| 2001          | 34,030                         | 81.4                  | 74.5                  |                                |                       |                       | 30,546                         | 82.7                  | 82.0                  |                                |                       |                       |
| 2002          | 33,241                         | 73.6                  | 57.6                  | 4053                           | 71.1                  | 69.3                  | 30,213                         | 84.5                  | 83.7                  |                                |                       |                       |
| 2003          | 33,762                         | 52.3                  | 36.1                  | 27,310                         | 69.8                  | 67.2                  | 30,925                         | 84.8                  | 84.0                  | 53,623                         | 77.9                  | 72.4                  |
| 2004          | 13,184                         | 58.4                  | 43.0                  |                                |                       |                       | 31,208                         | 86.8                  | 85.8                  |                                |                       |                       |

Abbreviations: HPV1: First dose of Human papilloma virus vaccine; HPV2: Second dose of Human papilloma virus vaccine

<sup>1</sup>The coverage reflects the number of registered vaccines and may thus underestimate the actual vaccination coverage. <sup>2</sup>Including girls from birth cohorts where HPV vaccination has been offered from 1 year before age of recommended vaccination until 14 years of age and where vaccinations were registered in the vaccination registers. The years with available data is defined based on introduction of HPV vaccinations into the National immunization programme or introduction of vaccination register whichever comes last until last date with available data from both the population register and vaccination register.

**sTable 3: Socio-economic factors at 10 years of age**

|                                                                                                           | Denmark   |       | Finland   |       | Norway    |       | Sweden    |       |
|-----------------------------------------------------------------------------------------------------------|-----------|-------|-----------|-------|-----------|-------|-----------|-------|
|                                                                                                           | N         | (%)   | N         | (%)   | N         | (%)   | N         | (%)   |
| Children present in country at birth from 2004-2015                                                       | 793,471   |       | 687,721   |       | 726,257   |       | 1,205,112 |       |
| Birth cohorts included                                                                                    | 1994-2005 |       | 1994-2005 |       | 1994-2005 |       | 1994-2005 |       |
| Income quintile at 10 years of age                                                                        |           |       |           |       |           |       |           |       |
| First (lowest)                                                                                            | 147,098   | 18.5% | 135,946   | 19.8% | 141,762   | 19.5% | 219,673   | 18.2% |
| Second                                                                                                    | 149,579   | 18.9% | 136,334   | 19.8% | 146,247   | 20.1% | 241,503   | 20.0% |
| Third                                                                                                     | 149,865   | 18.9% | 136,384   | 19.8% | 146,604   | 20.2% | 245,097   | 20.3% |
| Fourth                                                                                                    | 149,310   | 18.8% | 136,259   | 19.8% | 146,471   | 20.2% | 245,138   | 20.3% |
| Fifth                                                                                                     | 146,712   | 18.5% | 135,464   | 19.7% | 144,939   | 20.0% | 241,452   | 20.0% |
| Unknown                                                                                                   | 50,907    | 6.4%  | 7334      | 1.1%  | 234       | 0.0%  | 12,249    | 1.0%  |
| Number of children in the household the year the child turns 10 years of age                              |           |       |           |       |           |       |           |       |
| 1                                                                                                         | 103,585   | 13.1% | 96,861    | 14.1% | 119,295   | 16.4% | 162,968   | 13.5% |
| 2                                                                                                         | 405,367   | 51.1% | 293,068   | 42.6% | 336,480   | 46.3% | 587,332   | 48.7% |
| 3                                                                                                         | 213,413   | 26.9% | 184,925   | 26.9% | 208,045   | 28.6% | 292,516   | 24.3% |
| >3                                                                                                        | 61,674    | 7.8%  | 103,561   | 15.1% | 62,203    | 8.6%  | 105,595   | 8.8%  |
| Unknown                                                                                                   | 9432      | 1.2%  | 9306      | 1.4%  | 234       | 0.0%  | 12,249    | 1.0%  |
| Single parenthood in the years the child turns 10 years of age                                            |           |       |           |       |           |       |           |       |
| Yes                                                                                                       | 151,471   | 19.1% | 124,986   | 18.2% | 131,761   | 18.1% | 268,484   | 22.3% |
| No                                                                                                        | 632,568   | 79.7% | 553,429   | 80.5% | 587,793   | 80.9% | 924,379   | 76.7% |
| Unknown                                                                                                   | 9432      | 1.2%  | 9306      | 1.4%  | 6703      | 0.9%  | 12,249    | 1.0%  |
| Highest attained educational level <sup>1</sup> of the mother on the date the child turns 10 years of age |           |       |           |       |           |       |           |       |
| Low education                                                                                             | 135,466   | 17.1% | 75,462    | 11.0% | 138,351   | 19.0% | 193,551   | 16.1% |
| Medium education                                                                                          | 340,574   | 42.9% | 281,479   | 40.9% | 270,114   | 37.2% | 515,407   | 42.8% |
| High education                                                                                            | 303,384   | 38.2% | 329,885   | 48.0% | 305,368   | 42.0% | 394,220   | 32.7% |
| Unknown                                                                                                   | 14,047    | 1.8%  | 895       | 0.1%  | 12,424    | 1.7%  | 101,934   | 8.5%  |

<sup>1</sup> Highest attained education was categorized based on the International Standard Classification of Education (ISCED) 2011 using the main groups (1).

**sTable 4: ATC codes obtained for the study population in each country within NONSEnse**

| ATC-Group                                                                                                                                                                            | Denmark | Finland          | Norway | Sweden                                  |
|--------------------------------------------------------------------------------------------------------------------------------------------------------------------------------------|---------|------------------|--------|-----------------------------------------|
| D                                                                                                                                                                                    | D       | D07, D11AH       | D      | D02AF, D05<br>D07, D11<br>D01, D06, D08 |
| J                                                                                                                                                                                    | J       | J                | J      | J01-J06<br>J07                          |
| R                                                                                                                                                                                    | R       | R01, R03, R06    | R      | R01, R03, R06                           |
| S                                                                                                                                                                                    | S       | S01G, S03        | S      | S01-S03                                 |
| V                                                                                                                                                                                    | V01     | V01 <sup>1</sup> | V01    | V01                                     |
| <sup>1</sup> Data on redeemed prescriptions with ATC=V01 is only available from the Finnish Benefits Registry, which holds information only for reimbursable redeemed prescriptions. |         |                  |        |                                         |

## References

1. UNESCO Institute for Statistics. International standard classification of education: ISCED 2011. 2012.
